# Supplementary material
Source: MDPI journal article supplement (https://www.mdpi.com/1424-8247/14/10/1027)
Supplement: s1 [file s1]

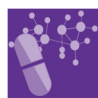

## Article

# In Silico studies of potential selective inhibitors of thymidylate kinase from *Variola virus*

Danielle R. Garcia<sup>1</sup>, Felipe R. de Souza<sup>2</sup>, Ana P. Guimarães<sup>3</sup>, Martin Valis<sup>4</sup>, Zbyšek Pavelek<sup>4</sup>, Kamil Kuca<sup>5,6\*</sup>, Teodorico C. Ramalho<sup>5,7</sup> and Tanos C. C. França<sup>1,5,\*</sup>

<sup>1</sup>Laboratory of Molecular Modeling Applied to Chemical and Biological Defense, Military Institute of Engineering, Praça General Tibúrcio 80, Urca, 22290-270, Rio de Janeiro/RJ – Brazil. [danielle.ime@gmail.com](mailto:danielle.ime@gmail.com) (D.R.G);

<sup>2</sup>Department of Chemistry, Pontifical Catholic University of Rio de Janeiro, Rio de Janeiro/RJ – Brazil. [feliperodsouza@gmail.com](mailto:feliperodsouza@gmail.com) (F.R.S);

<sup>3</sup>Department of Chemistry, Federal University of Viçosa, Avenida P. H. Rolfs, no number, Centro, 36570-000, Viçosa/MG – Brazil; [ana.paula.guimaraesime@gmail.com](mailto:ana.paula.guimaraesime@gmail.com) (A.P.G);

<sup>4</sup>Department of Neurology of the Medical Faculty of Charles University and University Hospital in Hradec Kralove, Sokolska 581, 50005 Hradec Kralove, Czech Republic; [martin.valis@fnhk.cz](mailto:martin.valis@fnhk.cz) (M.V); [zbysekpavelek@email.cz](mailto:zbysekpavelek@email.cz) (Z.P)

<sup>5</sup>Department of Chemistry, Faculty of Science, University of Hradec Kralove, Rokytanského 62, 50003, Hradec Kralove, Czech Republic. [kamil.kuca@uhk.cz](mailto:kamil.kuca@uhk.cz) (K. K).

<sup>6</sup>Biomedical Research Center, University Hospital in Hradec Kralove, Sokolska 581, 50005 Hradec Kralove, Czech Republic;

<sup>7</sup>Laboratory of Computational Chemistry, Department of Chemistry, UFLA, 37200-000, Lavras/MG – Brazil.

\* Correspondence: [tanos@ime.eb.br](mailto:tanos@ime.eb.br) (T.C.C.F); [kamil.kuca@uhk.cz](mailto:kamil.kuca@uhk.cz) (K. K).

## Supplementary Material

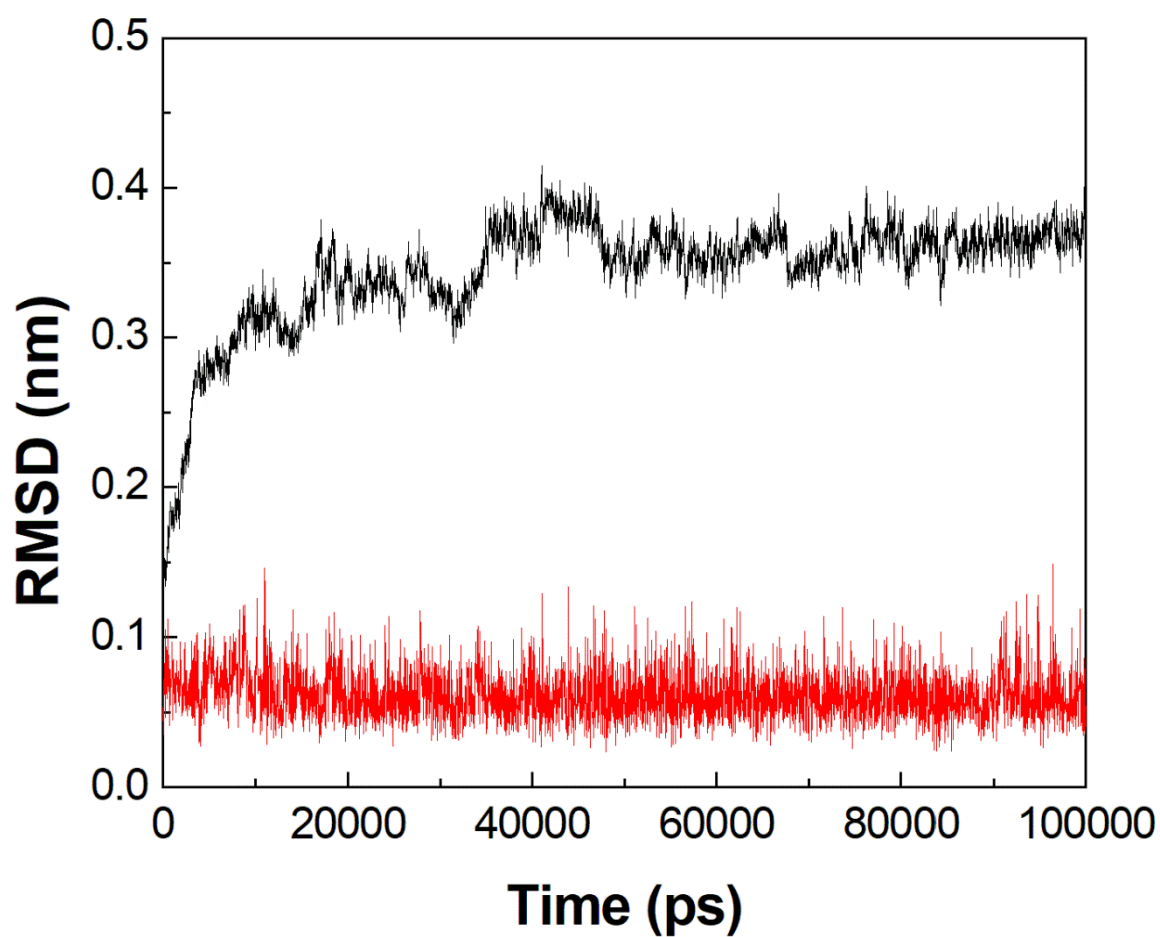

**Figure S1** - RMSD of the first MD simulation for the system HssTMPK/Compound 2. Black - Protein; Red - Compound 2.

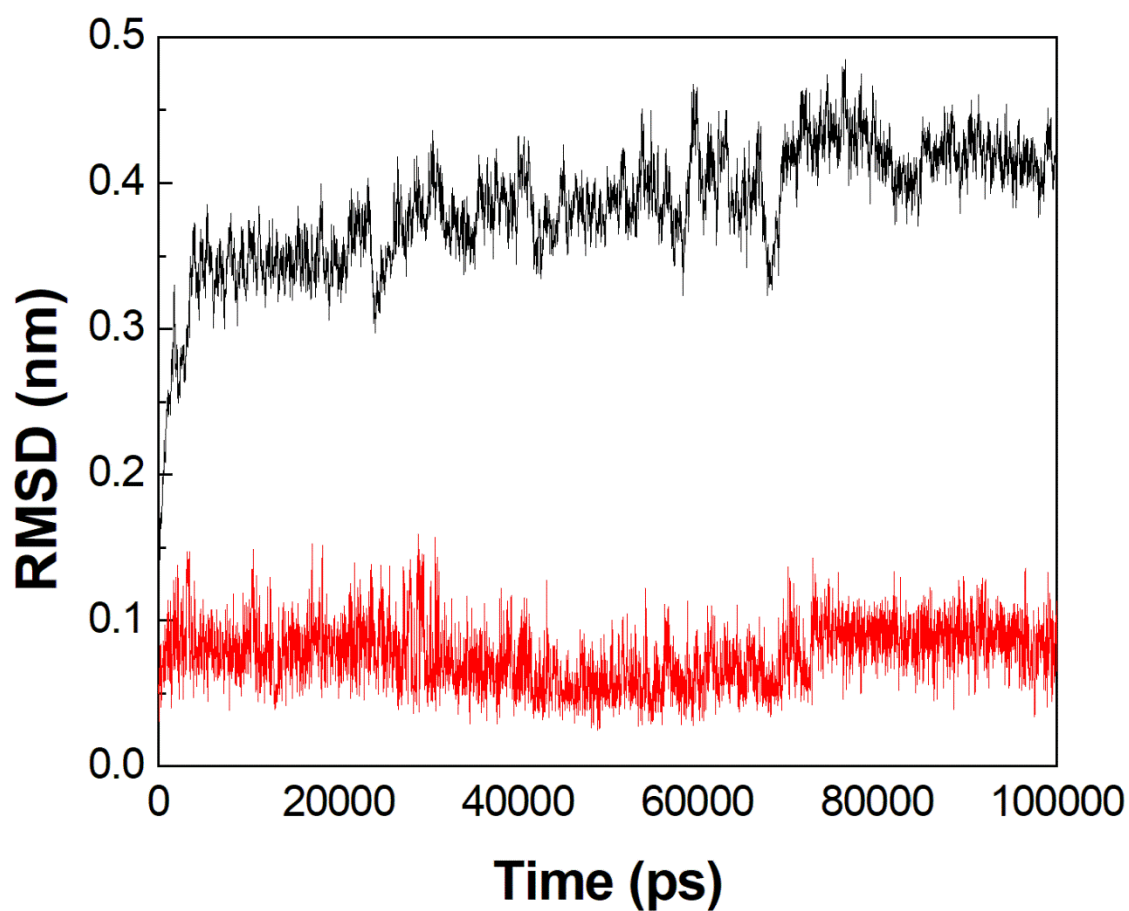

**Figure S2** - RMSD of the second MD simulation for the system HssTMPK/Compound 2. Black - Protein; Red - Compound 2.

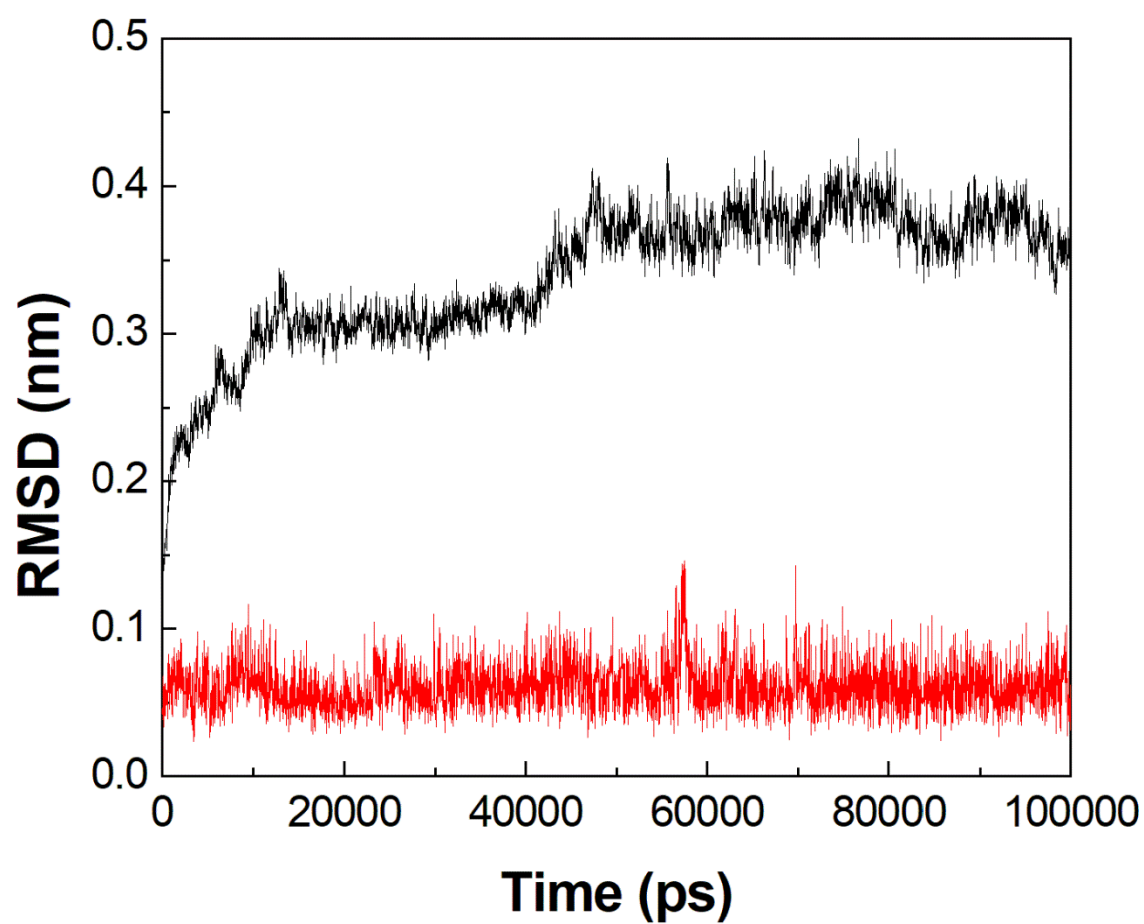

**Figure S3** - RMSD of the third MD simulation for the system HssTMPK/Compound 2. Black - Protein; Red - Compound 2.

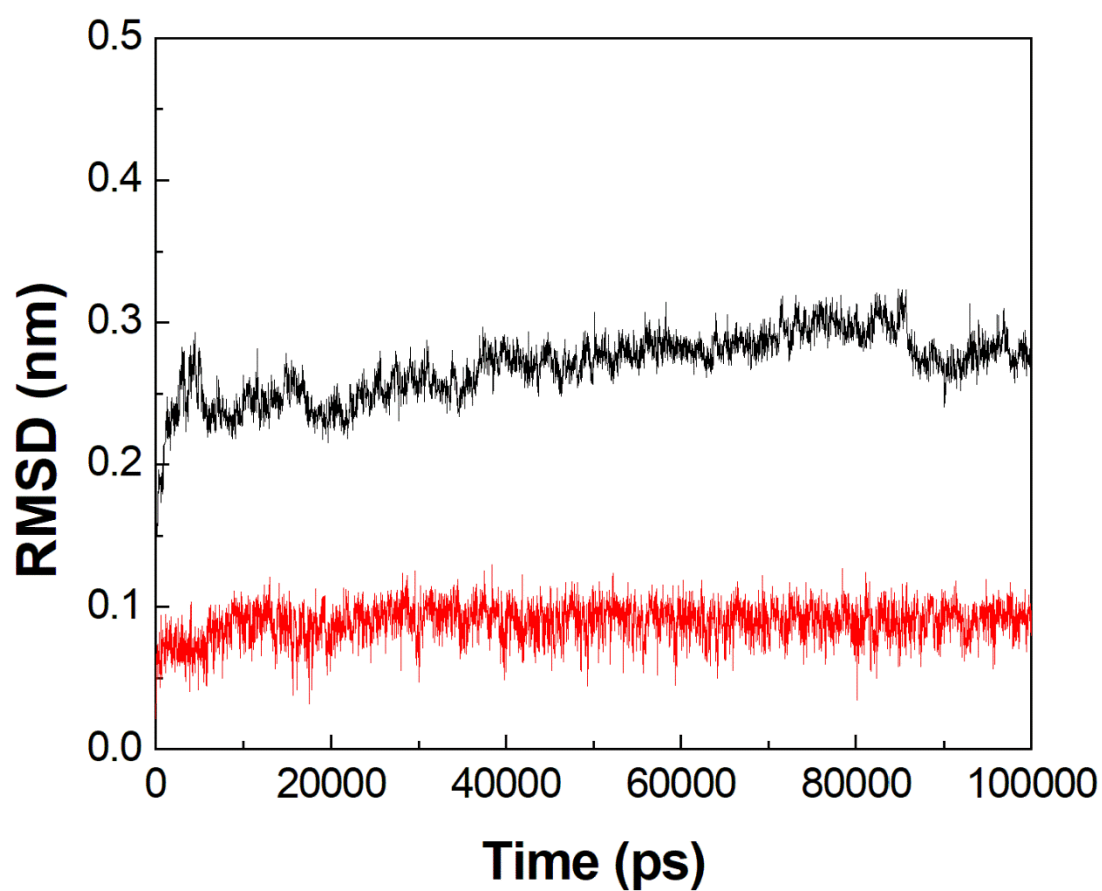

**Figure S4** - RMSD of the first MD simulation for the system VarTMPK/Compound 2. Black - Protein; Red - Compound 2.

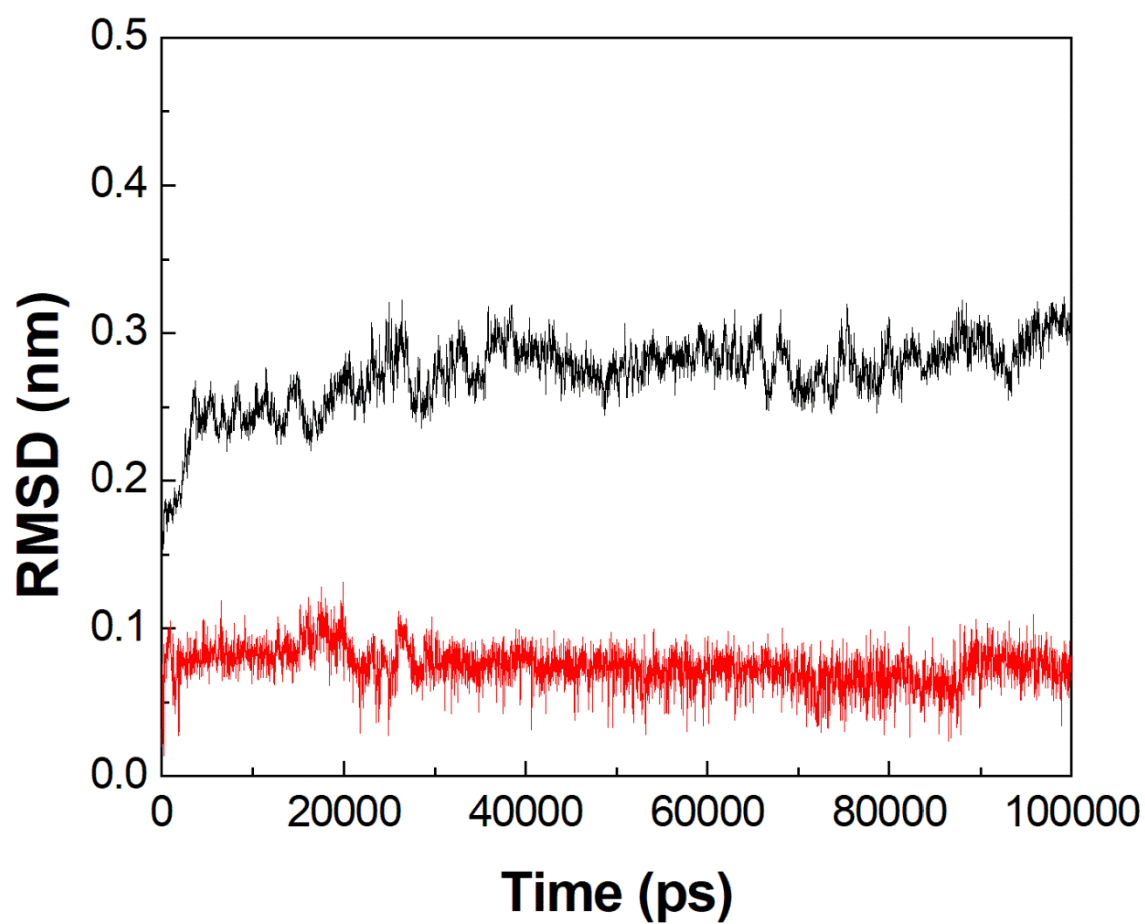

**Figure S5** - RMSD of the second MD simulation for the system VarTMPK/Compound 2. Black - Protein; Red - Compound 2.

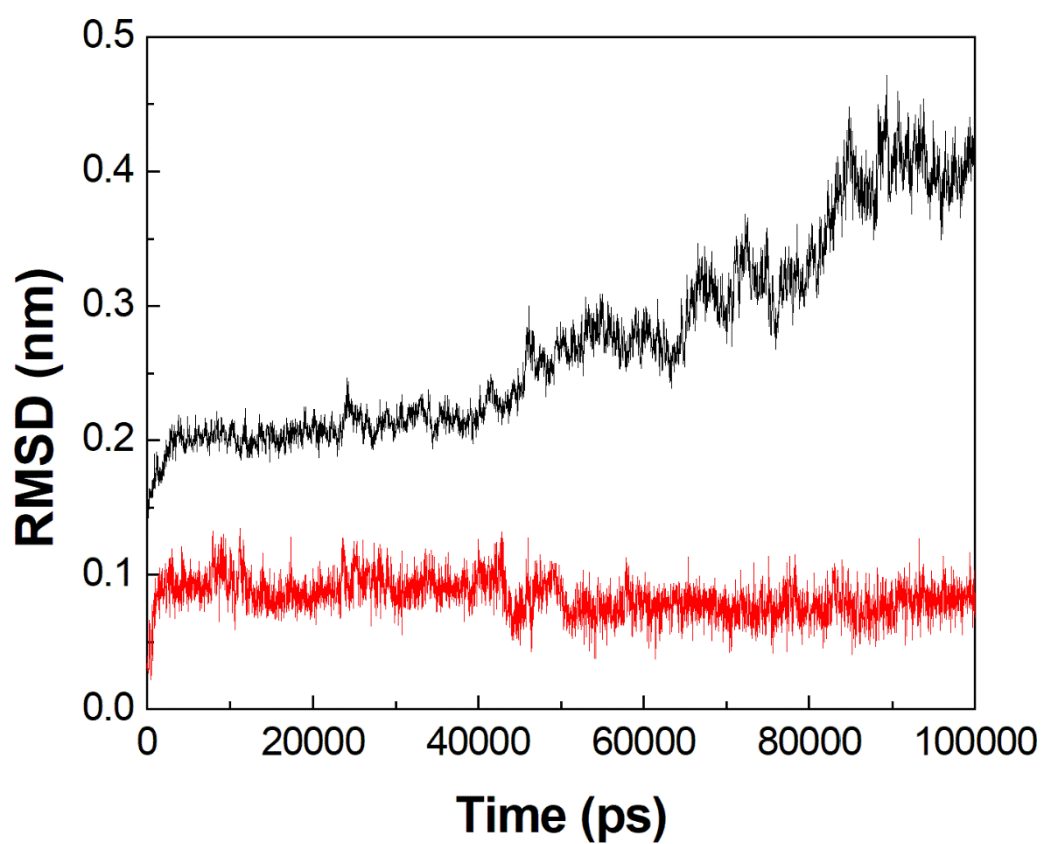

**Figure S6** - RMSD of the third MD simulation for the system VarTMPK/Compound 2. Black - Protein; Red - Compound 2.
